### Corrigendum

**Bell, H. A., Marris, G. C., Prickett, A. J. and Edwards, J. P.** (2005). Influence of host size on the clutch size and developmental success of the gregarious ectoparasitoid *Eulophus pennicornis* (Nees) (Hymenoptera: Braconidae) attacking larvae of the tomato moth *Lacanobia oleracea* (L.) (Lepidoptera: Noctuidae). *J. Exp. Biol.* **208**, 3199-3209.

The family of the parasitoid *Eulophus pennicornis* was incorrectly stated in the title of this article as Braconidae. This should, in fact, have read Eulophidae. The correct title of the article should be:

Influence of host size on the clutch size and developmental success of the gregarious ectoparasitoid *Eulophus pennicornis* (Nees) (Hymenoptera: Eulophidae) attacking larvae of the tomato moth *Lacanobia oleracea* (L.) (Lepidoptera: Noctuidae).

The authors apologise for this error.
